# Supplementary material
Source: MDPI journal article supplement (https://www.mdpi.com/2073-4344/13/1/211)
Supplement: s1 [file s1 › catalysts-2132505-supplementary.pdf]

## Supplementary Information

The list of catalysts is presented in Table S1. According to the results of the Rietveld refinement, all samples are represented by a mixture of solid solutions and simple oxides of Mn. The diffraction pattern of the Mn<sub>0.3</sub>Ce<sub>0.1</sub>Zr<sub>0.6</sub> catalyst did not allow us to determine its phase composition; therefore, this sample is not presented in further analysis.

**Table S1.** List of catalysts.

| Catalyst                                                | Mn  | Ce   | Zr   | T <sub>50</sub> (CO), °C | T <sub>50</sub> (C <sub>3</sub> H <sub>8</sub> ), °C |
|---------------------------------------------------------|-----|------|------|--------------------------|------------------------------------------------------|
| Mn <sub>0.5</sub> Ce <sub>0.25</sub> Zr <sub>0.25</sub> | 0.5 | 0.25 | 0.25 | 140                      | 267                                                  |
| Mn <sub>0.6</sub> Ce <sub>0.2</sub> Zr <sub>0.2</sub>   | 0.6 | 0.2  | 0.2  | 142                      | 270                                                  |
| Mn <sub>0.4</sub> Ce <sub>0.3</sub> Zr <sub>0.3</sub>   | 0.4 | 0.3  | 0.3  | 147                      | 276                                                  |
| Mn <sub>0.7</sub> Ce <sub>0.15</sub> Zr <sub>0.15</sub> | 0.7 | 0.1  | 0.15 | 151                      | 271                                                  |
| Mn <sub>0.4</sub> Ce <sub>0.5</sub> Zr <sub>0.1</sub>   | 0.4 | 0.5  | 0.1  | 157                      | 274                                                  |
| Mn <sub>0.8</sub> Ce <sub>0.1</sub> Zr <sub>0.1</sub>   | 0.8 | 0.1  | 0.1  | 158                      | 273                                                  |
| Mn <sub>0.3</sub> Ce <sub>0.35</sub> Zr <sub>0.35</sub> | 0.3 | 0.35 | 0.35 | 159                      | 268                                                  |
| Mn <sub>0.5</sub> Ce <sub>0.5</sub>                     | 0.5 | 0.5  | 0    | 160                      | 259                                                  |
| Mn <sub>0.3</sub> Ce <sub>0.2</sub> Zr <sub>0.5</sub>   | 0.3 | 0.2  | 0.5  | 162                      | 258                                                  |
| Mn <sub>0.2</sub> Ce <sub>0.4</sub> Zr <sub>0.4</sub>   | 0.2 | 0.4  | 0.4  | 163                      | 293                                                  |
| Mn <sub>0.3</sub> Ce <sub>0.6</sub> Zr <sub>0.1</sub>   | 0.3 | 0.6  | 0.1  | 164                      | 267                                                  |
| Mn <sub>0.3</sub> Ce <sub>0.5</sub> Zr <sub>0.2</sub>   | 0.3 | 0.5  | 0.2  | 164                      | 284                                                  |
| Mn <sub>0.3</sub> Zr <sub>0.7</sub>                     | 0.3 | 0    | 0.7  | 172                      | 314                                                  |
| Mn <sub>0.3</sub> Ce <sub>0.1</sub> Zr <sub>0.6</sub>   | 0.3 | 0.1  | 0.6  | 175                      | 355                                                  |
| Mn <sub>0.3</sub> Ce <sub>0.7</sub>                     | 0.3 | 0.7  | 0    | 178                      | 309                                                  |
| Mn <sub>0.2</sub> Ce <sub>0.5</sub> Zr <sub>0.3</sub>   | 0.2 | 0.5  | 0.3  | 179                      | 315                                                  |
| Mn <sub>0.1</sub> Ce <sub>0.5</sub> Zr <sub>0.4</sub>   | 0.1 | 0.5  | 0.4  | 191                      | 375                                                  |
| Mn <sub>0.1</sub> Ce <sub>0.45</sub> Zr <sub>0.45</sub> | 0.1 | 0.45 | 0.45 | 196                      | 342                                                  |
| Ce <sub>0.5</sub> Zr <sub>0.5</sub>                     | 0   | 0.5  | 0.5  | 389                      | 471                                                  |
| MnO <sub>x</sub>                                        | 1   | 0    | 0    | 191                      | 285                                                  |

For all other samples, the correlations between the catalytic activity in the oxidation of CO and propane and other characteristics, such as the initial ratio of cations, Mn content in the solid solution composition, phase composition, solid solution lattice parameter, CSR, were studied. The temperature of 50% conversion T<sub>50</sub> (°C) was used as a measure of catalytic activity.

The following calculation method was used to estimate the position occupancies in the solid solution. In the case of the Ce<sub>0.5</sub>Zr<sub>0.5</sub> catalyst, according to the Rietveld method, sample contains 40 wt.% CeO<sub>2</sub> and 60 wt.% ZrO<sub>2</sub>. Analysis of cell parameters indicates that there are two solid solutions, for which the following designations are chosen: Ce<sub>x</sub>Zr<sub>1-x</sub>O<sub>2</sub> (40 wt.%) and t-Ce<sub>x</sub>Zr<sub>1-x</sub>O<sub>2</sub> (60 wt.%). Since in this case, both solid solutions consist only of Ce, Zr and O, it is possible to use the calibration curve (Vegard's rule) constructed from the lattice parameter for Ce-Zr solid solutions according to the literature data. This calculation showed the occupancy of Ce in the first solid solution x<sub>1</sub> = 0.95, and in the second x<sub>2</sub> = 0.24. This agrees with the initial ratio Ce/Zr = 1 during synthesis: after calculation Ce/Zr = 0.34/0.37.

In the case of the Mn<sub>0.5</sub>Ce<sub>0.5</sub> sample, for Mn<sub>1-x</sub>Ce<sub>x</sub>O<sub>2</sub> solid solutions, there are no literature data to build a calibration from the lattice parameter values. Therefore, in this case, the calculation will be made according to the quantitative phase composition and molar masses. We use the following designation for a solid solution: Ce<sub>x</sub>Mn<sub>1-x</sub>O<sub>2</sub>. The occupancy of Mn – x – is unknown, but it is possible to estimate the amount of Mn and Ce, knowing their molar mass, and then choose such a value of x, so that the Mn/Ce ratio is close to the ratio when loading (Mn/Ce = 1). Thus, the phase composition of Mn<sub>0.5</sub>Ce<sub>0.5</sub> contains 87% Ce<sub>0.63</sub>Mn<sub>0.37</sub>O<sub>2</sub>, 8% Mn<sub>2</sub>O<sub>3</sub>, 5% Mn<sub>3</sub>O<sub>4</sub>.

The occupancies of positions in the solid solution in the Mn<sub>0.3</sub>Zr<sub>0.7</sub> sample were calculated in a similar way. In the case of ternary oxides, two phases of a solid solution of the composition Mn<sub>x</sub>1Ce<sub>y</sub>1Zr<sub>1-x-y</sub>O<sub>2</sub> and Mn<sub>x</sub>2Ce<sub>y</sub>2Zr<sub>1-x-y</sub>O<sub>2</sub> are formed, as indicated by the analysis of X-ray diffraction patterns by the Rietveld method. An exact calculation by the previous method with so many unknowns is impossible. Therefore, in this case, to estimate the populations, the approximation of one solid solution Mn<sub>x</sub>Ce<sub>y</sub>Zr<sub>1-x-y</sub>O<sub>2</sub> with an average lattice parameter and total phase content was used.

**Table S2.** Phase composition of catalysts.

| Catalyst                                                | Phase composition, wt %                                                                                                                              | Catalyst                                                | Phase composition, wt %                                                                                                                                                           |
|---------------------------------------------------------|------------------------------------------------------------------------------------------------------------------------------------------------------|---------------------------------------------------------|-----------------------------------------------------------------------------------------------------------------------------------------------------------------------------------|
| Mn <sub>0.1</sub> Ce <sub>0.5</sub> Zr <sub>0.4</sub>   | Ce <sub>0.5</sub> Mn <sub>0.1</sub> Zr <sub>0.4</sub> O <sub>2</sub>                                                                                 | Mn <sub>0.3</sub> Ce <sub>0.7</sub>                     | Ce <sub>0.7</sub> Mn <sub>0.3</sub> O <sub>2</sub>                                                                                                                                |
| Mn <sub>0.2</sub> Ce <sub>0.5</sub> Zr <sub>0.3</sub>   | 98% Ce <sub>0.52</sub> Mn <sub>0.17</sub> Zr <sub>0.31</sub> O <sub>2</sub><br>2% Mn <sub>2</sub> O <sub>3</sub>                                     | Mn <sub>0.3</sub> Zr <sub>0.7</sub>                     | 54% amorphous<br>40% Mn <sub>0.25</sub> Zr <sub>0.75</sub> O <sub>2</sub><br>6% Mn <sub>2</sub> O <sub>3</sub>                                                                    |
| Mn <sub>0.3</sub> Ce <sub>0.5</sub> Zr <sub>0.2</sub>   | 96% Ce <sub>0.54</sub> Mn <sub>0.25</sub> Zr <sub>0.21</sub> O <sub>2</sub><br>4% Mn <sub>2</sub> O <sub>3</sub>                                     | Mn <sub>0.1</sub> Ce <sub>0.45</sub> Zr <sub>0.45</sub> | Ce <sub>0.45</sub> Mn <sub>0.1</sub> Zr <sub>0.45</sub> O <sub>2</sub>                                                                                                            |
| Mn <sub>0.4</sub> Ce <sub>0.5</sub> Zr <sub>0.1</sub>   | 92% Ce <sub>0.58</sub> Mn <sub>0.3</sub> Zr <sub>0.12</sub> O <sub>2</sub><br>6% Mn <sub>2</sub> O <sub>3</sub><br>2% Mn <sub>3</sub> O <sub>4</sub> | Mn <sub>0.2</sub> Ce <sub>0.4</sub> Zr <sub>0.4</sub>   | Ce <sub>0.4</sub> Mn <sub>0.2</sub> Zr <sub>0.4</sub> O <sub>2</sub>                                                                                                              |
| Ce <sub>0.5</sub> Zr <sub>0.5</sub>                     | 40% Ce <sub>0.95</sub> Zr <sub>0.05</sub> O <sub>2</sub><br>60% Ce <sub>0.24</sub> Zr <sub>0.76</sub> O <sub>2</sub>                                 | Mn <sub>0.3</sub> Ce <sub>0.35</sub> Zr <sub>0.35</sub> | 94% Ce <sub>0.39</sub> Mn <sub>0.23</sub> Zr <sub>0.38</sub> O <sub>2</sub><br>6% Mn <sub>2</sub> O <sub>3</sub>                                                                  |
| Mn <sub>0.5</sub> Ce <sub>0.5</sub>                     | 87% Ce <sub>0.63</sub> Mn <sub>0.37</sub> O <sub>2</sub><br>8% Mn <sub>2</sub> O <sub>3</sub><br>5% Mn <sub>3</sub> O <sub>4</sub>                   | Mn <sub>0.4</sub> Ce <sub>0.3</sub> Zr <sub>0.3</sub>   | 92% Ce <sub>0.35</sub> Mn <sub>0.3</sub> Zr <sub>0.35</sub> O <sub>2</sub><br>4% Mn <sub>2</sub> O <sub>3</sub><br>4% Mn <sub>3</sub> O <sub>4</sub>                              |
| Mn <sub>0.3</sub> Ce <sub>0.6</sub> Zr <sub>0.1</sub>   | 20% amorphous<br>74% Ce <sub>0.71</sub> Mn <sub>0.17</sub> Zr <sub>0.12</sub> O <sub>2</sub><br>6% Mn <sub>2</sub> O <sub>3</sub>                    | Mn <sub>0.5</sub> Ce <sub>0.25</sub> Zr <sub>0.25</sub> | 82% Ce <sub>0.34</sub> Mn <sub>0.32</sub> Zr <sub>0.34</sub> O <sub>2</sub><br>7% Mn <sub>2</sub> O <sub>3</sub><br>11% Mn <sub>3</sub> O <sub>4</sub>                            |
| Mn <sub>0.3</sub> Ce <sub>0.5</sub> Zr <sub>0.2</sub>   | 96% Ce <sub>0.54</sub> Mn <sub>0.25</sub> Zr <sub>0.21</sub> O <sub>2</sub><br>4% Mn <sub>2</sub> O <sub>3</sub>                                     | Mn <sub>0.6</sub> Ce <sub>0.2</sub> Zr <sub>0.2</sub>   | 73% Ce <sub>0.32</sub> Mn <sub>0.36</sub> Zr <sub>0.32</sub> O <sub>2</sub><br>12% Mn <sub>2</sub> O <sub>3</sub><br>15% Mn <sub>3</sub> O <sub>4</sub>                           |
| Mn <sub>0.3</sub> Ce <sub>0.35</sub> Zr <sub>0.35</sub> | 94% Ce <sub>0.39</sub> Mn <sub>0.22</sub> Zr <sub>0.39</sub> O <sub>2</sub><br>6% Mn <sub>2</sub> O <sub>3</sub>                                     | Mn <sub>0.7</sub> Ce <sub>0.15</sub> Zr <sub>0.15</sub> | 50% Ce <sub>0.41</sub> Mn <sub>0.18</sub> Zr <sub>0.41</sub> O <sub>2</sub><br>38% Mn <sub>2</sub> O <sub>3</sub><br>12% Mn <sub>3</sub> O <sub>4</sub>                           |
| Mn <sub>0.3</sub> Ce <sub>0.2</sub> Zr <sub>0.5</sub>   | 91% Ce <sub>0.23</sub> Mn <sub>0.19</sub> Zr <sub>0.58</sub> O <sub>2</sub><br>9% Mn <sub>2</sub> O <sub>3</sub>                                     | Mn <sub>0.8</sub> Ce <sub>0.1</sub> Zr <sub>0.1</sub>   | 33% Ce <sub>0.465</sub> Mn <sub>0.07</sub> Zr <sub>0.465</sub> O <sub>2</sub><br>30% Mn <sub>2</sub> O <sub>3</sub><br>22% Mn <sub>3</sub> O <sub>4</sub><br>15% MnO <sub>2</sub> |
| Mn <sub>0.3</sub> Ce <sub>0.1</sub> Zr <sub>0.6</sub>   | amorphous<br>CeO <sub>2</sub><br>Mn <sub>2</sub> O <sub>3</sub>                                                                                      | MnO <sub>x</sub>                                        | Mn <sub>2</sub> O <sub>3</sub>                                                                                                                                                    |

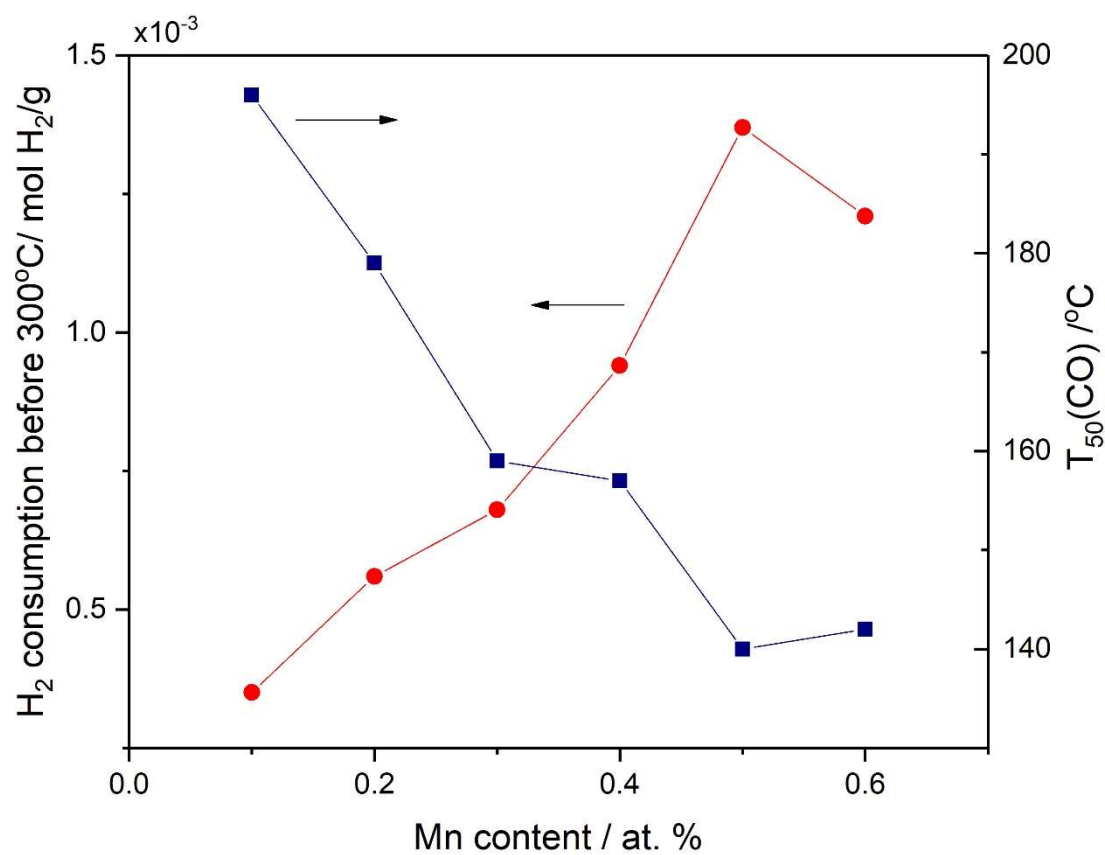

**Figure S1.** Temperature of 50% CO conversion (blue) and H<sub>2</sub> consumption before 300°C (red) versus the Mn content.

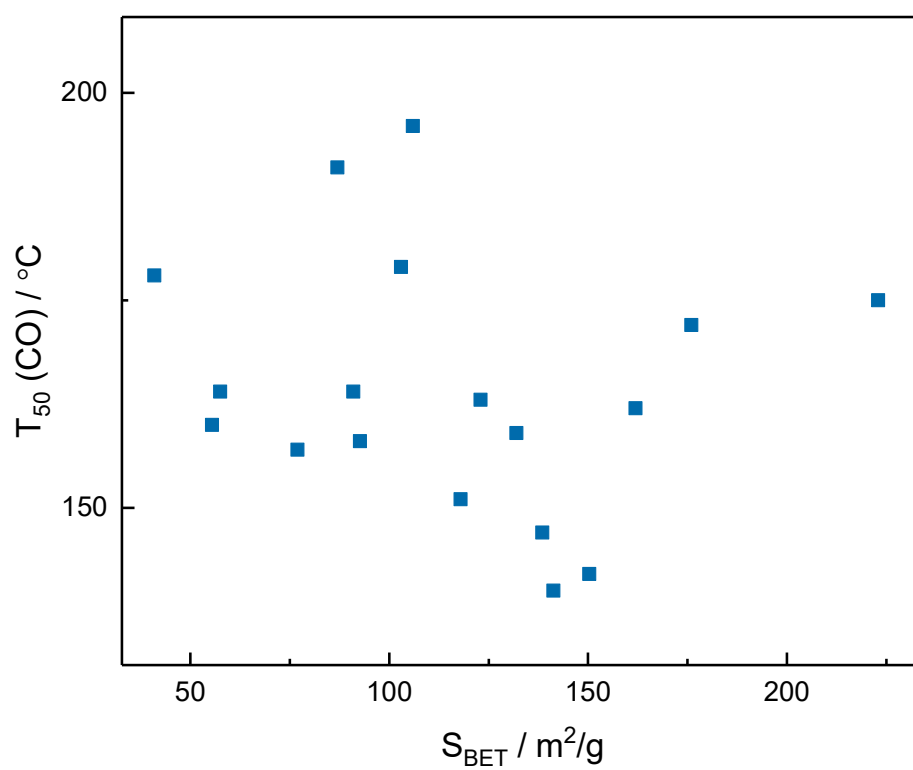

**Figure S2.** Temperature of 50% CO conversion versus the specific surface area ( $S_{\text{BET}}$ ) for all catalysts.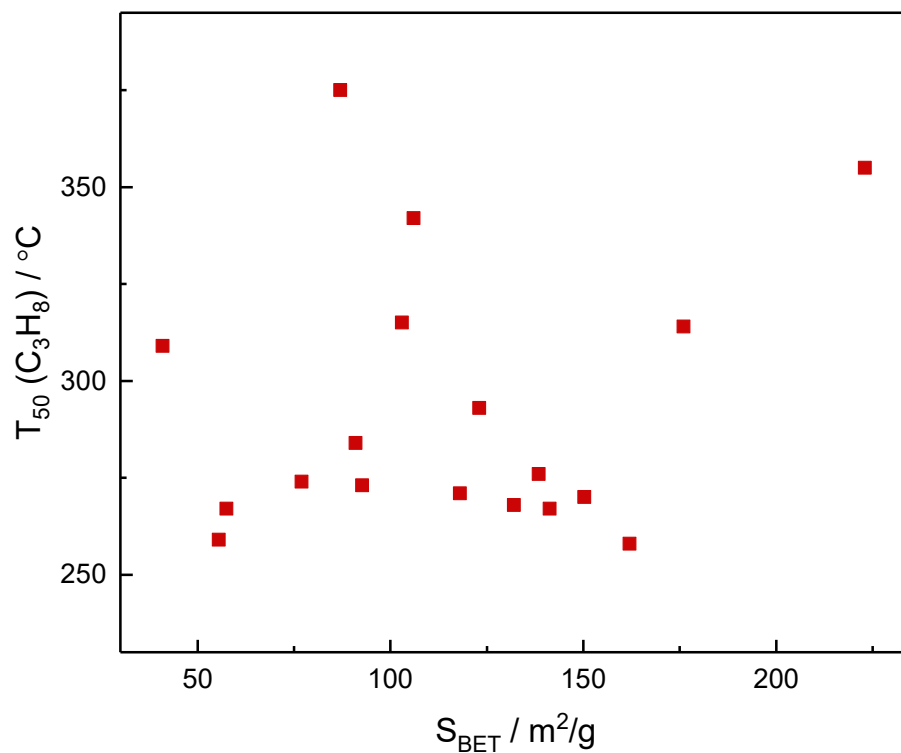**Figure S3.** Temperature of 50%  $\text{C}_3\text{H}_8$  conversion versus the specific surface area ( $S_{\text{BET}}$ ) for all catalysts.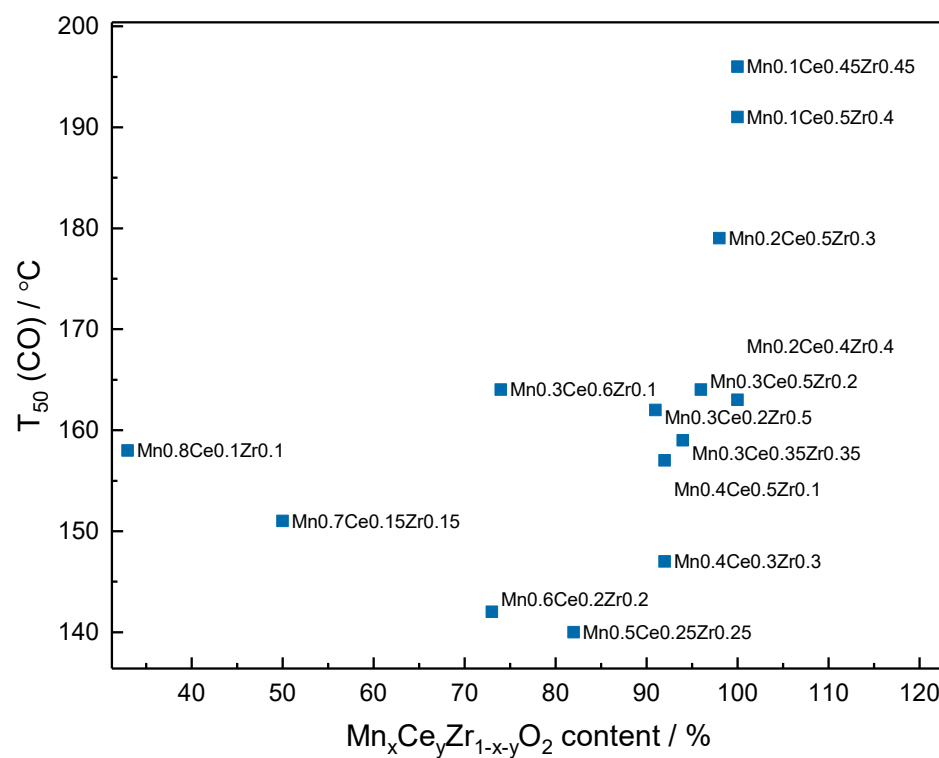**Figure S4.** Temperature of 50% CO conversion versus the content of solid solutions for all catalysts.

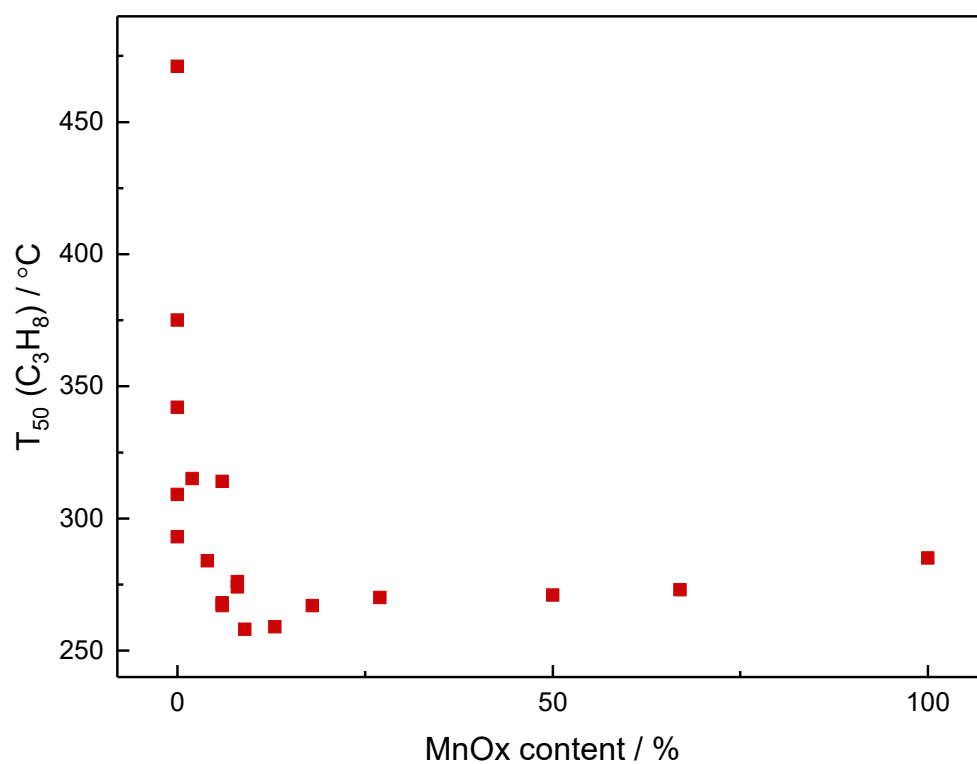

**Figure S5.** Temperature of 50%  $\text{C}_3\text{H}_8$  conversion versus the content of crystalline Mn oxides for all catalysts.

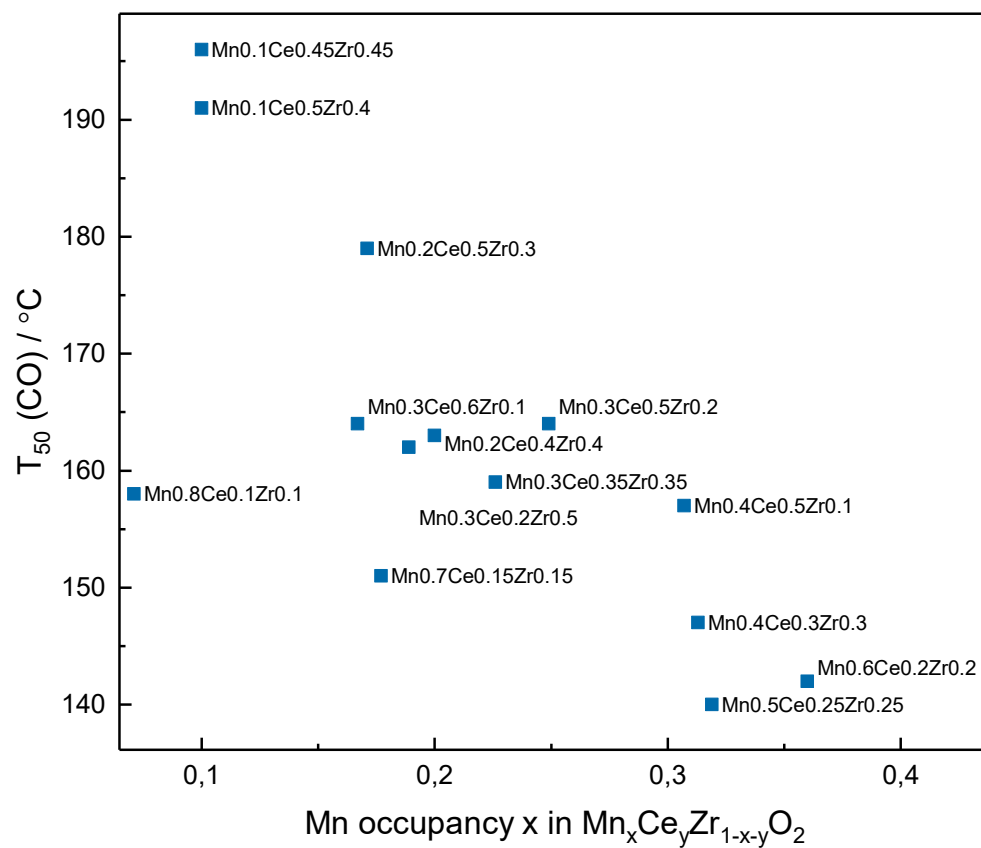

**Figure S6.** Temperature of 50% CO conversion versus the content of Mn (x) in  $\text{Mn}_x\text{Ce}_y\text{Zr}_{1-x-y}\text{O}_2$  solid solution for all catalysts.

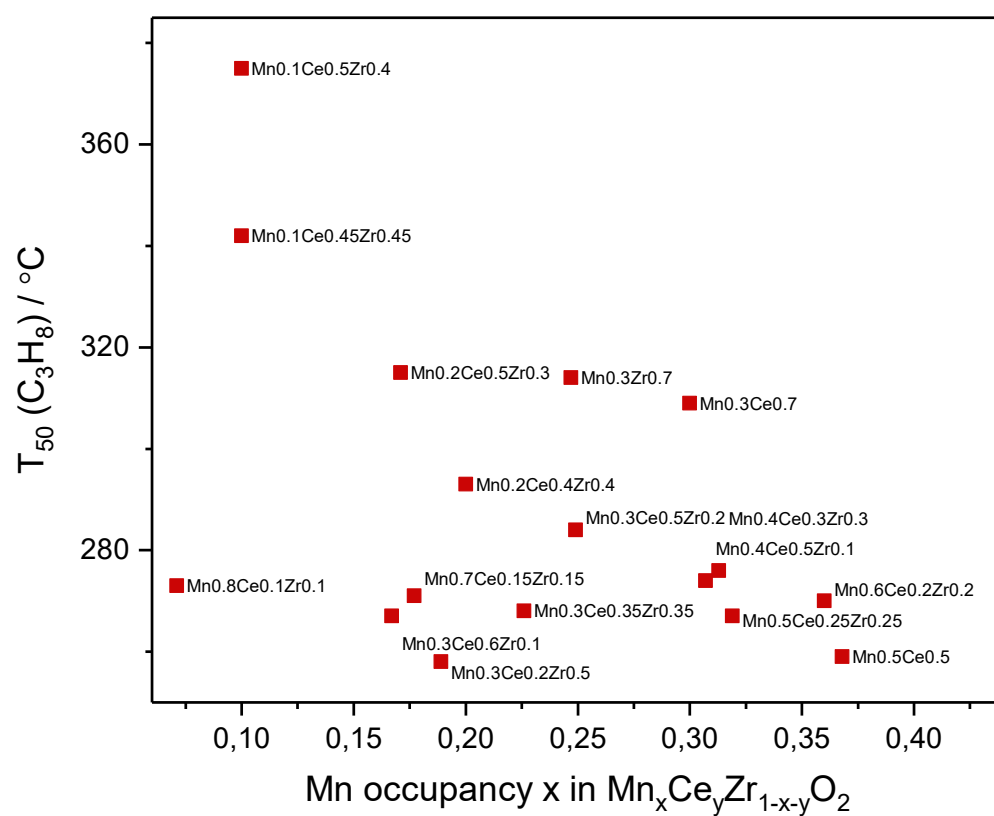

**Figure S7.** Temperature of 50%  $C_3H_8$  conversion versus the content of Mn ( $x$ ) in  $Mn_xCe_yZr_{1-x-y}O_2$  solid solution for all catalysts.
